# Supplementary material for: Computational Characterization of Small Molecules Binding to the Human XPF Active Site and Virtual Screening to Identify Potential New DNA Repair Inhibitors Targeting the ERCC1-XPF Endonuclease
Source: MDPI journal article supplement (doi:10.3390/ijms19051328), 2018-04-30
Supplement: s1 [file s1]

|                                                                                                                                      |                                                                                                                                       |                                                                                                                                        |
|--------------------------------------------------------------------------------------------------------------------------------------|---------------------------------------------------------------------------------------------------------------------------------------|----------------------------------------------------------------------------------------------------------------------------------------|
| <p>1</p> 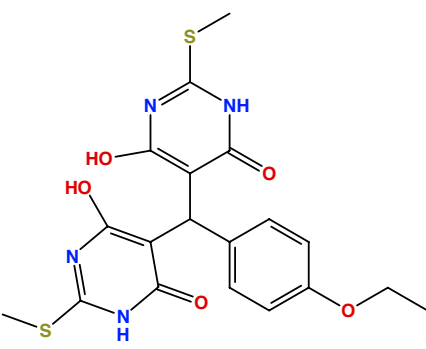 <p>ZINC000008716670<br/>S: -37.4250</p>   | <p>2</p>  <p>ZINC000343571284<br/>S: -36.8954</p>   | <p>3</p>  <p>ZINC000225405110<br/>S: -36.3228</p>   |
| <p>4</p>  <p>ZINC000006536259<br/>S: -35.9038</p>  | <p>5</p>  <p>ZINC000049131978<br/>S: -35.3001</p>  | <p>6</p>  <p>ZINC000262069698<br/>S: -34.4474</p>  |
| <p>7</p>  <p>ZINC000358583786<br/>S: -34.4412</p> | <p>8</p>  <p>ZINC000104212093<br/>S: -34.0721</p> | <p>9</p>  <p>ZINC000020227150<br/>S: -33.6701</p> |

10

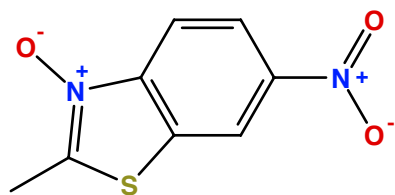

ZINC000045237915

S: -33.6330

11

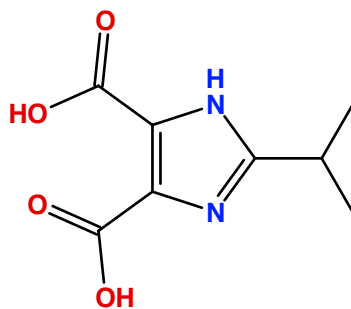

ZINC000071774011

S: -33.5102

12

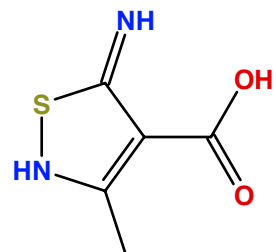

ZINC000032714687

S: -33.0514

13

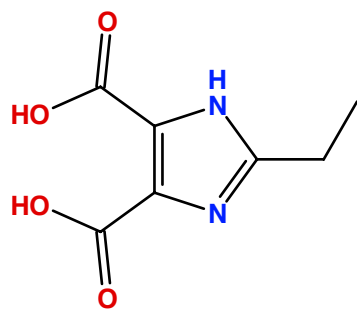

ZINC000038550857

S: -32.8777

14

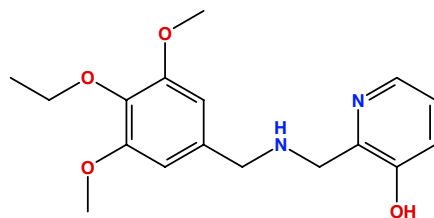

ZINC000347902752

S: -32.8049

15

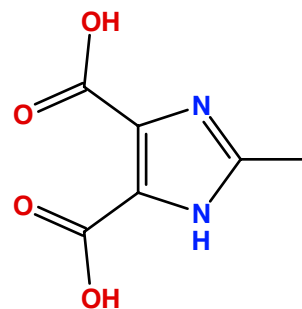

ZINC000015886568

S: -32.7778

16

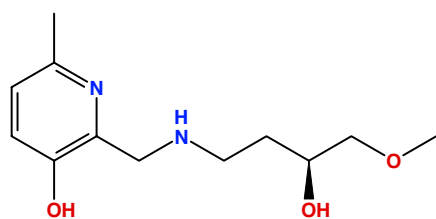

ZINC000231608350

S: -32.3570

17

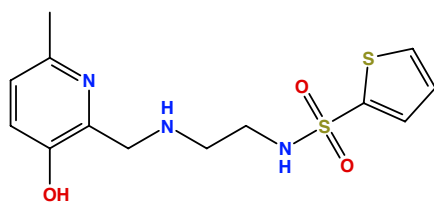

ZINC000122283098

S: -32.3530

18

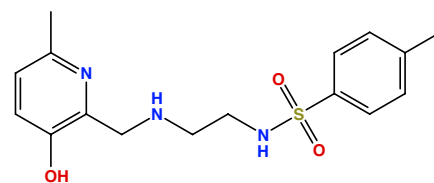

ZINC000103344220

S: -32.3287

19

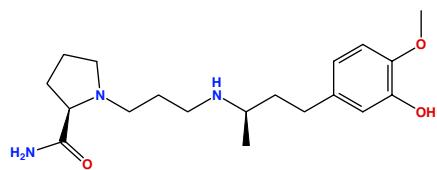

ZINC000277276522

S: -32.2163

20

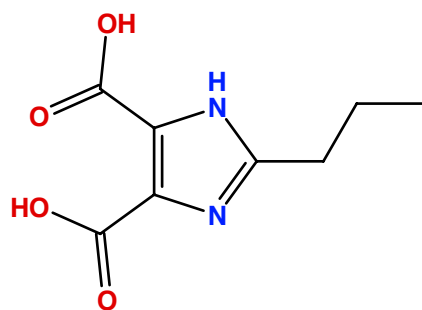

ZINC000021299679

S: -32.1401

21

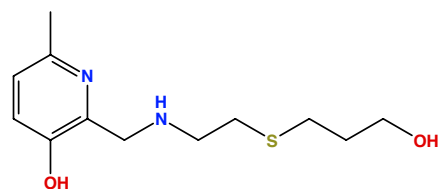

ZINC000105643133

S: -32.1053

22

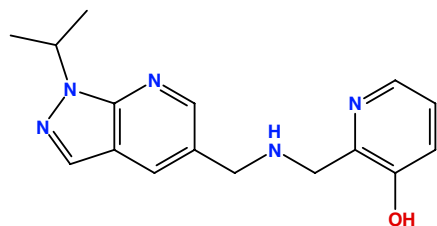

ZINC000348012855

S: -32.0948

23

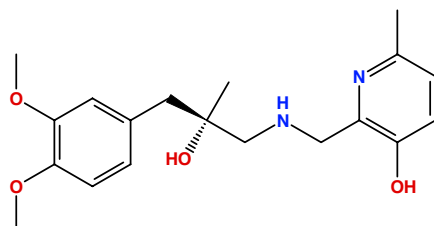

ZINC000289920009

S: -31.9850

24

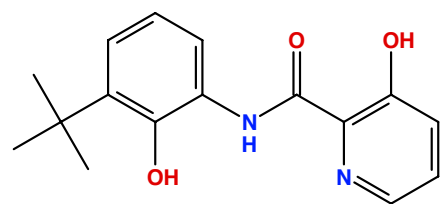

ZINC000361793164

S: -31.9330

25

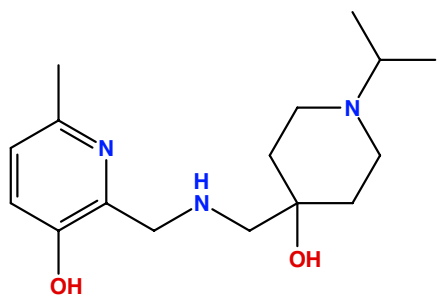

ZINC000268407008

S: -31.9033

26

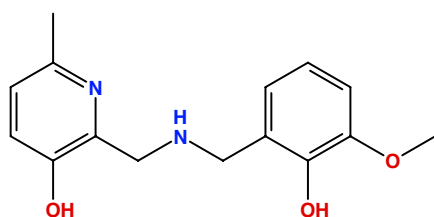

ZINC000265089061

S: -31.7699

27

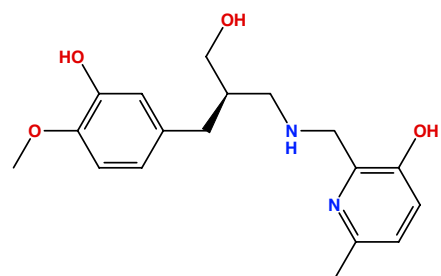

ZINC000289505839

S: -31.7633

28

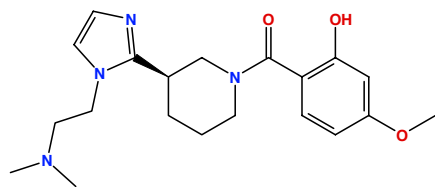

ZINC000095501050  
S: -31.7463

29

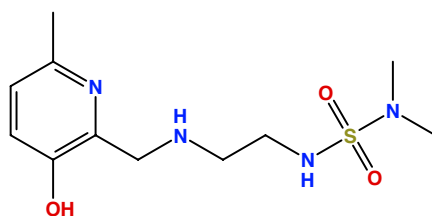

ZINC000291399311  
S: -31.7250

30

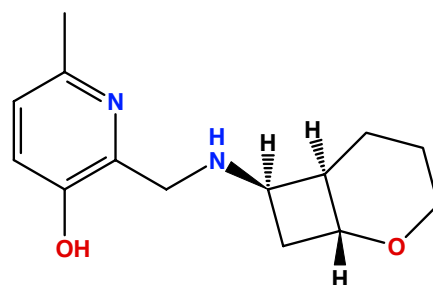

ZINC000365283038  
S: -31.6944

31

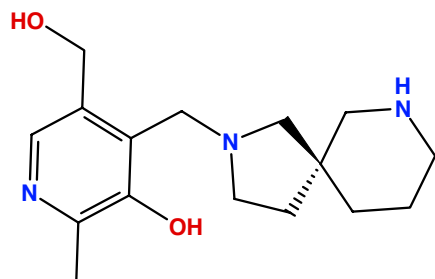

ZINC000067895942  
S: -31.6731

32

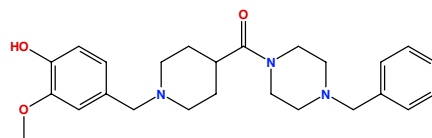

ZINC000000819207  
S: -31.5902

33

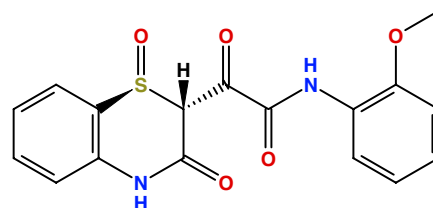

ZINC000005824033  
S: -31.5793

34

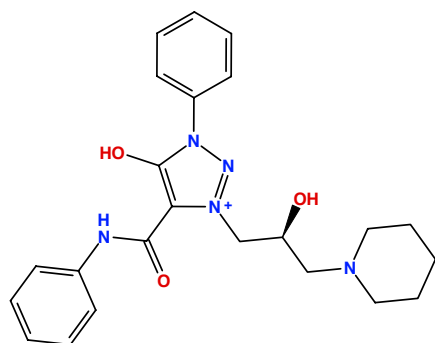

ZINC000025182949  
S: -31.5429

35

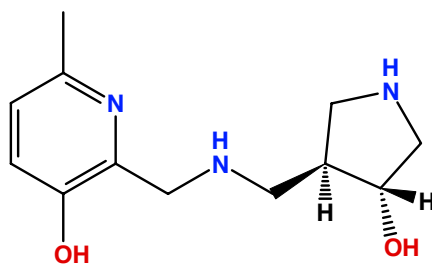

ZINC000262069699  
S: -31.4854

36

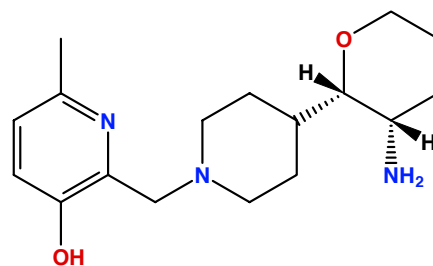

ZINC000333182225  
S: -31.4640

37

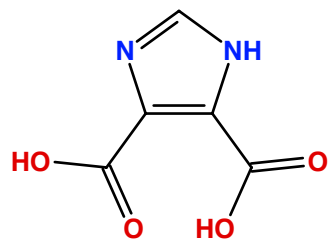

ZINC000015852947

S: -31.4342

38

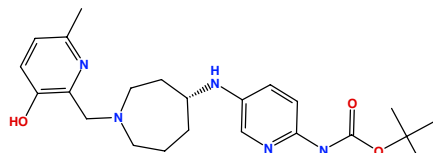

ZINC000170618062

S: -31.3782

39

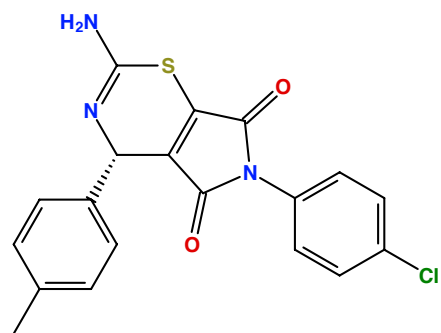

ZINC000002219244

S: -31.3611

40

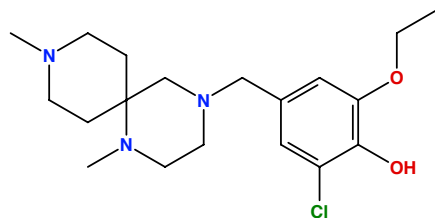

ZINC000067886560

S: -31.3346

41

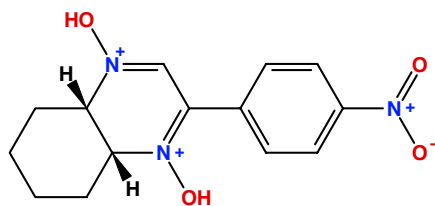

ZINC000225405065

S: -31.2085

42

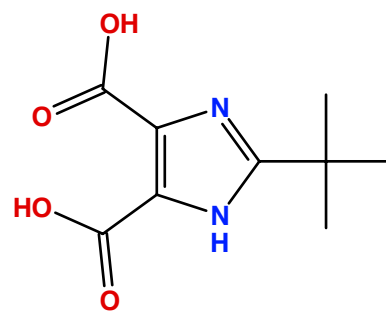

ZINC000038550858

S: -31.2061

43

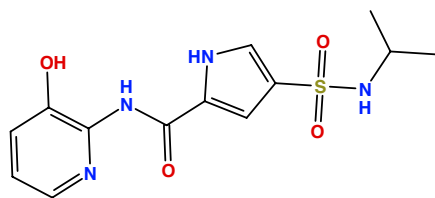

ZINC000341887368

S: -31.1700

44

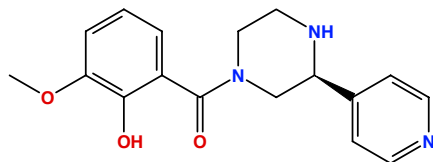

ZINC000374391981

S: -31.1451

45

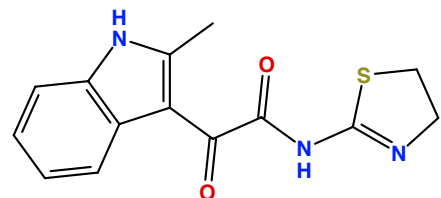

ZINC000030601464

S: -31.0931

46

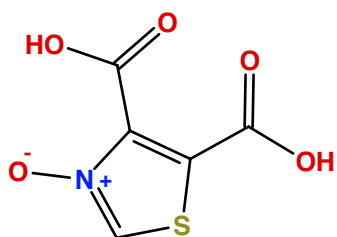

ZINC000247390923

S: -30.9737

47

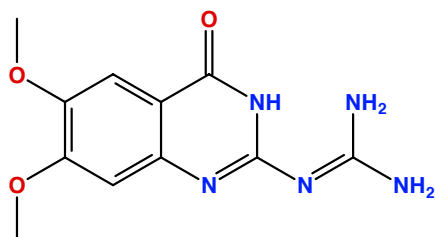

ZINC000006136419

S: -30.8818

48

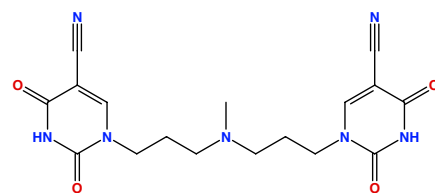

ZINC000008431352

S: -30.8005

49

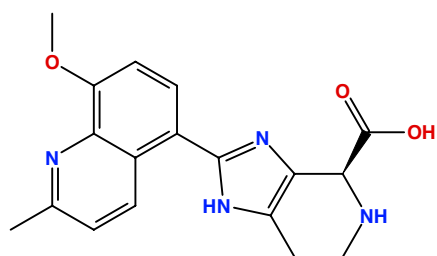

ZINC000077503807

S: -30.7688

50

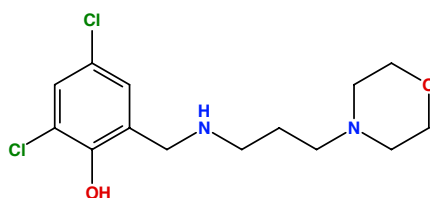

ZINC000021519793

S: -30.6758
